# Supplementary material for: A Qualitative Comparison of the Abbott SARS-CoV-2 IgG II Quant Assay against Commonly Used Canadian SARS-CoV-2 Enzyme Immunoassays in Blood Donor Retention Specimens, April 2020 to March 2021
Source: PubMed Central journal article supplement (PMC9241784; doi:10.1128/spectrum.01134-22), 2022-06-02
Supplement: reviewer-comments.pdf [file reviewer-comments.pdf]

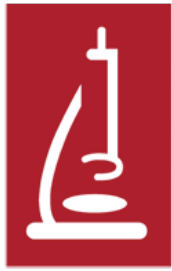

AMERICAN  
SOCIETY FOR  
MICROBIOLOGY

# Microbiology Spectrum

## **A qualitative comparison of the Abbott SARS-CoV-2 IgG II Quant assay against commonly used Canadian SARS-CoV-2 enzyme immunoassays in blood donor retention specimens, April 2020 to March 2021.**

Kento Abe, Bhavisha Rathod, Karen Colwill, Anne-Claude Gingras, Ashleigh Tuite, Ninette Robbins, Guillermo Orjuela, Craig Jenkins, Valerie Conrod, Qi-Long Yi, Sheila O'Brien, and Steven Drews

*Corresponding Author(s): Steven Drews, Canadian Blood Services*

---

### **Review Timeline:**

|                     |                |
|---------------------|----------------|
| Submission Date:    | March 28, 2022 |
| Editorial Decision: | May 2, 2022    |
| Revision Received:  | May 10, 2022   |
| Accepted:           | May 14, 2022   |

---

*Editor: Heba Mostafa*

*Reviewer(s): Disclosure of reviewer identity is with reference to reviewer comments included in decision letter(s). The following individuals involved in review of your submission have agreed to reveal their identity: Vincent Streva (Reviewer #1)*

### **Transaction Report:**

(Note: With the exception of the correction of typographical or spelling errors that could be a source of ambiguity, letters and reports are not edited. The original formatting of letters and referee reports may not be reflected in this compilation.)

**DOI:** <https://doi.org/10.1128/spectrum.01134-22>

May 2, 2022

Dr. Steven J Drews  
Canadian Blood Services  
8249 114 St NW  
Edmonton, Alberta T6G 2R8  
Canada

Re: Spectrum01134-22 (A qualitative comparison of the Abbott SARS-CoV-2 IgG II Quant assay against commonly used Canadian SARS-CoV-2 enzyme immunoassays in blood donor retention specimens, April 2020 to March 2021.)

Dear Dr. Steven J Drews:

Thank you for submitting your manuscript to Microbiology Spectrum. When submitting the revised version of your paper, please provide (1) point-by-point responses to the issues raised by the reviewers as file type "Response to Reviewers," not in your cover letter, and (2) a PDF file that indicates the changes from the original submission (by highlighting or underlining the changes) as file type "Marked Up Manuscript - For Review Only". Please use this link to submit your revised manuscript - we strongly recommend that you submit your paper within the next 60 days or reach out to me. Detailed instructions on submitting your revised paper are below.

Link Not Available

Below you will find instructions from the Microbiology Spectrum editorial office and comments generated during the review.

ASM policy requires that data be available to the public upon online posting of the article, so please verify all links to sequence records, if present, and make sure that each number retrieves the full record of the data. If a new accession number is not linked or a link is broken, provide production staff with the correct URL for the record. If the accession numbers for new data are not publicly accessible before the expected online posting of the article, publication of your article may be delayed; please contact the ASM production staff immediately with the expected release date.

The ASM Journals program strives for constant improvement in our submission and publication process. Please tell us how we can improve your experience by taking this quick [Author Survey](#).

Sincerely,

Heba Mostafa

Editor, Microbiology Spectrum

Journals Department  
American Society for Microbiology  
1752 N St., NW  
Washington, DC 20036  
E-mail: [spectrum@asmusa.org](mailto:spectrum@asmusa.org)

Reviewer comments:

Reviewer #1 (Comments for the Author):

In this paper, Abe et al. present a modest study of the Abbott SARS-CoV-2 IgG II Quant assay in a moderately sized patient population in Canada, comparing this assay to three other commonly used assays in Canada (one S-based assay, one S (RBD)-based assay, and one N-based assay). The study is largely descriptive, but provides good information that should be published for the field. Some minor comments/suggestions are indicated below:

1. It might be helpful to explain earlier in the manuscript (and in slightly more detail) the information on the Sinai assays (development, use in the field, etc.)

2. Minor typo: line 118 - remove "by" in "...this assay has been described by as 50 AU/mL..."
3. Please check the numbers in Tables 1 and 4. The rows (Abbott anti-S pos and neg) do not always add up to the same number. As per the manuscript text, the rows should add to 467 (Abbott anti-S positive) and 16,961 (Abbott anti-S negative), however in Table 1 they add to 481/16,947 and in Table 4 they add to 468/16,960.
4. I feel the Tables would be more clear if in addition to total numbers, they also contained percentage agreement and/or column/row totals so that a quick comparison and rough sensitivity/specificity comparison could be made.
5. I would be particularly interested in knowing more about the clinical history of the fifteen patients listed in Table 5. Is there anything in the history to help explain the discordant results?
6. Table 6: for consistency, please switch the order of the two columns (Positive first, then negative) so that they match the other tables.

Staff Comments:

### Preparing Revision Guidelines

To submit your modified manuscript, log onto the eJP submission site at <https://spectrum.msubmit.net/cgi-bin/main.plex>. Go to Author Tasks and click the appropriate manuscript title to begin the revision process. The information that you entered when you first submitted the paper will be displayed. Please update the information as necessary. Here are a few examples of required updates that authors must address:

- Point-by-point responses to the issues raised by the reviewers in a file named "Response to Reviewers," NOT IN YOUR COVER LETTER.
- Upload a compare copy of the manuscript (without figures) as a "Marked-Up Manuscript" file.
- Each figure must be uploaded as a separate file, and any multipanel figures must be assembled into one file.
- Manuscript: A .DOC version of the revised manuscript
- Figures: Editable, high-resolution, individual figure files are required at revision, TIFF or EPS files are preferred

For complete guidelines on revision requirements, please see the journal Submission and Review Process requirements at <https://journals.asm.org/journal/Spectrum/submission-review-process>. **Submissions of a paper that does not conform to Microbiology Spectrum guidelines will delay acceptance of your manuscript.** "

Please return the manuscript within 60 days; if you cannot complete the modification within this time period, please contact me. If you do not wish to modify the manuscript and prefer to submit it to another journal, please notify me of your decision immediately so that the manuscript may be formally withdrawn from consideration by Microbiology Spectrum.

If your manuscript is accepted for publication, you will be contacted separately about payment when the proofs are issued; please follow the instructions in that e-mail. Arrangements for payment must be made before your article is published. For a complete list of **Publication Fees**, including supplemental material costs, please visit our [website](#).

Corresponding authors may [join or renew ASM membership](#) to obtain discounts on publication fees. Need to upgrade your membership level? Please contact Customer Service at [Service@asmusa.org](mailto:Service@asmusa.org).

Thank you for submitting your paper to Microbiology Spectrum.

In this paper, Abe et al. present a modest study of the Abbott SARS-CoV-2 IgG II Quant assay in a moderately sized patient population in Canada, comparing this assay to three other commonly used assays in Canada (one S-based assay, one S (RBD)-based assay, and one N-based assay). The study is largely descriptive, but provides good information that should be published for the field. Some minor comments/suggestions are indicated below:

1. It might be helpful to explain earlier in the manuscript (and in slightly more detail) the information on the Sinai assays (development, use in the field, etc.)
2. Minor typo: line 118 – remove “by” in “...this assay has been described by as 50 AU/mL...”
3. Please check the numbers in Tables 1 and 4. The rows (Abbott anti-S pos and neg) do not always add up to the same number. As per the manuscript text, the rows should add to 467 (Abbott anti-S positive) and 16,961 (Abbott anti-S negative), however in Table 1 they add to 481/16,947 and in Table 4 they add to 468/16,960.
4. I feel the Tables would be more clear if in addition to total numbers, they also contained percentage agreement and/or column/row totals so that a quick comparison and rough sensitivity/specificity comparison could be made.
5. I would be particularly interested in knowing more about the clinical history of the fifteen patients listed in Table 5. Is there anything in the history to help explain the discordant results?
6. Table 6: for consistency, please switch the order of the two columns (Positive first, then negative) so that they match the other tables.

To the Editor,

Microbiology Spectrum

Thank you for the reviewer's comments. We will provide a point-by-point response to each of the comments below

1. It might be helpful to explain earlier in the manuscript (and in slightly more detail) the information on the Sinai assays (development, use in the field, etc.)

We have added further descriptions of the Sinai assays in the introductory text.

2. Minor typo: line 118 - remove "by" in "...this assay has been described by as 50 AU/mL..."

This change has been made

3. Please check the numbers in Tables 1 and 4. The rows (Abbott anti-S pos and neg) do not always add up to the same number. As per the manuscript text, the rows should add to 467 (Abbott anti-S positive) and 16,961 (Abbott anti-S negative), however in Table 1 they add to 481/16,947 and in Table 4 they add to 468/16,960.

We have gone through all the data in Tables 1-4 and corrected the Tables. We have also recalculated the Kappa estimates and clarified the method for determination of SE as per Cohen in the references.

4. I feel the Tables would be more clear if in addition to total numbers, they also contained percentage agreement and/or column/row totals so that a quick comparison and rough sensitivity/specificity comparison could be made.

The calculation of a percentage agreements as well as row and column totals were done for Tables 1-4. In Table 6, because this is a sensitivity/specificity matrix table, we show row and column totals.

5. I would be particularly interested in knowing more about the clinical history of the fifteen patients listed in Table 5. Is there anything in the history to help explain the discordant results?

Because these were healthy blood donors, they would not have provided clinical information on COVID-19 disease. We have added this information to the caveats section of the discussion.

6. Table 6: for consistency, please switch the order of the two columns (Positive first, then negative) so that they match the other tables.

Table 6 was modified.

May 14, 2022

Dr. Steven J Drews  
Canadian Blood Services  
8249 114 St NW  
Edmonton, Alberta T6G 2R8  
Canada

Re: Spectrum01134-22R1 (A qualitative comparison of the Abbott SARS-CoV-2 IgG II Quant assay against commonly used Canadian SARS-CoV-2 enzyme immunoassays in blood donor retention specimens, April 2020 to March 2021.)

Dear Dr. Steven J Drews:

Your manuscript has been accepted, and I am forwarding it to the ASM Journals Department for publication. You will be notified when your proofs are ready to be viewed.

The ASM Journals program strives for constant improvement in our submission and publication process. Please tell us how we can improve your experience by taking this quick [Author Survey](#).

As an open-access publication, Spectrum receives no financial support from paid subscriptions and depends on authors' prompt payment of publication fees as soon as their articles are accepted. You will be contacted separately about payment when the proofs are issued; please follow the instructions in that e-mail. Arrangements for payment must be made before your article is published. For a complete list of **Publication Fees**, including supplemental material costs, please visit our [website](#).

ASM policy requires that data be available to the public upon online posting of the article, so please verify all links to sequence records, if present, and make sure that each number retrieves the full record of the data. If a new accession number is not linked or a link is broken, provide production staff with the correct URL for the record. If the accession numbers for new data are not publicly accessible before the expected online posting of the article, publication of your article may be delayed; please contact the ASM production staff immediately with the expected release date.

Corresponding authors may [join or renew ASM membership](#) to obtain discounts on publication fees. Need to upgrade your membership level? Please contact Customer Service at [Service@asmusa.org](mailto:Service@asmusa.org).

Thank you for submitting your paper to Spectrum.

Sincerely,

Heba Mostafa  
Editor, Microbiology Spectrum

Journals Department  
American Society for Microbiology  
1752 N St., NW  
Washington, DC 20036  
E-mail: [spectrum@asmusa.org](mailto:spectrum@asmusa.org)
